# Supplementary material for: A facial expression recognition network based on attention double branch enhanced fusion
Source: PeerJ Comput Sci. 2024 Aug 28;10:e2266. doi: 10.7717/peerj-cs.2266 (PMC11419636; doi:10.7717/peerj-cs.2266)
Supplement: Supplemental Information 1 [file peerj-cs-10-2266-s001.xlsx]

## Sheet: Sheet1
Table 1 FERPlus Dataset Details
Expression	Training set	Test set	Sum
neutral	9913	1083	10996
happiness	8146	892	9038
surprise	3547	394	3941
sadness	3370	382	3752
anger	2387	269	2656
disgust	141	16	157
fear	596	86	682
contempt	136	15	151
Sum	28236	3137	31373
