# Supplementary material for: A facial expression recognition network based on attention double branch enhanced fusion
Source: PeerJ Comput Sci. 2024 Aug 28;10:e2266. doi: 10.7717/peerj-cs.2266 (PMC11419636; doi:10.7717/peerj-cs.2266)
Supplement: Supplemental Information 2 [file peerj-cs-10-2266-s002.xlsx]

## Sheet: Sheet1
Table 2 RAFDB Dataset Details
Expression	Training set	Test set	Sum
Surprise	1290	329	1619
Fear	281	74	355
Disgust	717	160	877
Happiness	4772	1185	5957
Sadness	1982	478	2460
Anger	705	162	867
Neutral	2524	680	3204
Sum	12271	3068	15339
