# Supplementary material for: A facial expression recognition network based on attention double branch enhanced fusion
Source: PeerJ Comput Sci. 2024 Aug 28;10:e2266. doi: 10.7717/peerj-cs.2266 (PMC11419636; doi:10.7717/peerj-cs.2266)
Supplement: Supplemental Information 3 [file peerj-cs-10-2266-s003.xlsx]

## Sheet: Sheet1
Table 3 Parameter settings of proposed network
Parameter Name	Parameter settings
Input image size	224*224
Initial learning rate	0.01
Attenuation step size	10
Attenuation factor	0.1
Optimizer	SGD
Batch size	32
weight decay	0.0001
momentum	0.9
λ	0.6
Epoch	100
