# Supplementary material for: A facial expression recognition network based on attention double branch enhanced fusion
Source: PeerJ Comput Sci. 2024 Aug 28;10:e2266. doi: 10.7717/peerj-cs.2266 (PMC11419636; doi:10.7717/peerj-cs.2266)
Supplement: Supplemental Information 4 [file peerj-cs-10-2266-s004.xlsx]

## Sheet: Sheet1
Table 4 The performance of the proposed network model on the FERPlus dataset
Classes	Precision	Recall	F1-Score	Specificity
neutral	0.885	0.916	0.9	0.937
happiness	0.946	0.962	0.95	0.978
surprise	0.875	0.904	0.89	0.981
sadness	0.789	0.785	0.79	0.971
anger	0.884	0.848	0.87	0.99
disgust	1	0.438	0.59	1
fear	0.818	0.523	0.62	0.997
contempt	0.5	0.067	0.12	1
