# Supplementary material for: A facial expression recognition network based on attention double branch enhanced fusion
Source: PeerJ Comput Sci. 2024 Aug 28;10:e2266. doi: 10.7717/peerj-cs.2266 (PMC11419636; doi:10.7717/peerj-cs.2266)
Supplement: Supplemental Information 5 [file peerj-cs-10-2266-s005.xlsx]

## Sheet: Sheet1
Table 5 The performance of the proposed network model on the RAF-DB dataset
Classes	Precision	Recall	F1-Score	Specificity
Surprise	0.89	0.857	0.87	0.987
Fear	0.734	0.635	0.68	0.994
Disgust	0.732	0.65	0.69	0.987
Happiness	0.966	0.953	0.96	0.979
Sadness	0.863	0.91	0.89	0.973
Anger	0.825	0.846	0.84	0.99
Neutral	0.863	0.896	0.88	0.959
