# Supplementary material for: A facial expression recognition network based on attention double branch enhanced fusion
Source: PeerJ Comput Sci. 2024 Aug 28;10:e2266. doi: 10.7717/peerj-cs.2266 (PMC11419636; doi:10.7717/peerj-cs.2266)
Supplement: Supplemental Information 6 [file peerj-cs-10-2266-s006.xlsx]

## Sheet: Sheet1
Table 6 Analysis of Different Fusion Strategies
Datasets	Fusion strategy	Accuracy
FERPlus	Feature level fusion	85.75
	Decision level fusion	88.84
RAFDB	Feature level fusion	86.28
	Decision level fusion	89.41
