# Supplementary material for: A facial expression recognition network based on attention double branch enhanced fusion
Source: PeerJ Comput Sci. 2024 Aug 28;10:e2266. doi: 10.7717/peerj-cs.2266 (PMC11419636; doi:10.7717/peerj-cs.2266)
Supplement: Supplemental Information 7 — Vo TH, Lee GS, Yang HJ, Kim SH. 2020. Pyramid with super resolution for in-the-wild facial expression recognition. IEEE Access 8:131988–132001 DOI 10.1109/ACCESS.2020.3010018. [file peerj-cs-10-2266-s007.xlsx]

## Sheet: Sheet1
Table 7 Comparison based on model size and inference time
Methods	Params (M)	FLOPs (G)
EfficientFace (Zhao Z. et al., 2021)	1.28	0.15
SCN (Wang K. et al., 2020)	11.18	1.82
RAN (Wang K. et al., 2020)	11.19	14.55
PSR (Vo T. H. et al., 2020)	20.24	10.12
DACL (Farzaneh A H, et al., 2021)	103.04	1.91
MMANet (Wang W., et al., 2023)	21.01	0.59
ResNet18(base)	11.69	1.82
Ours	16.33	1.87
