# Supplementary material for: A facial expression recognition network based on attention double branch enhanced fusion
Source: PeerJ Comput Sci. 2024 Aug 28;10:e2266. doi: 10.7717/peerj-cs.2266 (PMC11419636; doi:10.7717/peerj-cs.2266)
Supplement: Supplemental Information 8 [file peerj-cs-10-2266-s008.xlsx]

## Sheet: Sheet1
Table 8 Recognition rates of different networks on RAF-DB datasets
Dataset	Methods	Accuracy /%
RAF-DB	ResNet18(base)	82.73
	LANet(Ma H. et al., 2021)	86.7
	RAN(Wang K, et al., 2020)	86.9
	MMANet(Wang W, et al., 2023)	87.16
	MAPNet(Ju L, et al., 2022)	87.26
	EfficientFace(Zhao Z, et al., 2021)	88.36
	MA-Net(Zhao Z, et al., 2021)	88.4
	MFNet(Gong W, et al., 2022)	88.53
	SCAN+CC(Gera D., et al., 2021)	89.02
	AMP-Net(Chaudhari S, et al., 2021)	89.25
	Ours	89.41
