# Supplementary material for: A facial expression recognition network based on attention double branch enhanced fusion
Source: PeerJ Comput Sci. 2024 Aug 28;10:e2266. doi: 10.7717/peerj-cs.2266 (PMC11419636; doi:10.7717/peerj-cs.2266)
Supplement: Supplemental Information 9 — Ma F, Sun B, Li S. 2021. Facial expression recognition with visual transformers and attentional selective fusion. IEEE Transactions on Affective Computing 14(2):1236–1248 DOI 10.1109/TAFFC.2021.3122146 [file peerj-cs-10-2266-s009.xlsx]

## Sheet: Sheet1
Table 9 Recognition rates of different networks on FERPlus datasets
Dataset	Methods	Accuracy /%
FERPlus	ResNet18(base)	83.83
	gACNN(Li Y, et al., 2018)	84.86
	MMANet(Wang W, et al., 2023)	86.41
	SCN(Wang K, et al., 2020)	88.01
	SpResNet-ViT(Gao W, et al., 2022)	88.1
	IPD-FER(Jiang J, et al., 2022)	88.42
	RAN(Wang K, et al., 2020)	88.55
	PACVT(Liu C, et al., 2023)	88.72
	VTFF(Ma F, et al., 2021)	88.81
	Ours	88.84
